# Supplementary material for: Examination of Gender-Related Differential Item Functioning Through Poly-BW Indices
Source: Frontiers journal article supplement (doi:10.3389/fpsyg.2022.821459), 2022-02-25
Supplement: Data_Sheet_1.PDF [file Data_Sheet_1.PDF]

Appendix A. Specifications of mathematics items by content and format

|                                           | Items (Max Scores)                                              | Total score |
|-------------------------------------------|-----------------------------------------------------------------|-------------|
| <b><i>Item Content</i></b>                |                                                                 |             |
| <b><i>Arithmetic</i></b>                  |                                                                 | 41          |
| <i>Addition/Subtraction of Integer</i>    | 2(2), 11(2), 19(2)                                              | 6           |
| <i>Multiplication/Division of Integer</i> | 1(2), 10(3), 27(3)                                              | 8           |
| <i>Operation of Fraction</i>              | 3(3), 4(3), 28(3), 29(3)                                        | 12          |
| <i>Factor/Multiple</i>                    | 12(3), 13(4), 20(5), 21(3)                                      | 15          |
| <hr/>                                     |                                                                 |             |
| <b><i>Algebra</i></b>                     |                                                                 | 54          |
| <i>Integer</i>                            | 6(2), 7(3), 8(3), 14(4), 18(2), 22(5),<br>23(5), 31(3), 32(4)   | 31          |
| <i>Fraction</i>                           | 9(3), 15(3), 16(3), 24(4),<br>25(3), 33(3), 34(4)               | 23          |
| <hr/>                                     |                                                                 |             |
| <b><i>Geometry</i></b>                    | 5(2), 17(4), 26(5), 30(2)                                       | 13          |
| <hr/>                                     |                                                                 |             |
| <b><i>Item Format</i></b>                 |                                                                 |             |
| <b><i>Operation/Computation</i></b>       | 1, 2, 3, 4, 5, 6, 7,<br>8, 9, 27, 28, 29, 30,<br>31, 32, 33, 34 | 47          |
| <hr/>                                     |                                                                 |             |
| <b><i>Word Problem</i></b>                |                                                                 | 61          |
| <i>Consumption Problems</i>               | 16, 23, 24, 25                                                  | 15          |
| <i>Others</i>                             | 10, 11, 12, 13, 14, 15,<br>17, 18, 19, 20, 21, 22, 26           | 46          |
| <b>Total</b>                              |                                                                 | 108         |

Appendix B. Math Test (For 7<sup>th</sup> grade middle school students)

- 1) Calculate  $(-81) \div 3 + (-27) \div (-9)$
- 2) Calculate  $[(-34987695) + 89993] + (-899930)$
- 3) Calculate  $\frac{4}{3} - \frac{3}{4} + \left(-\frac{2}{5}\right)$
- 4) Calculate  $4\frac{1}{5} \div 3\frac{2}{11} \times \left(-\frac{5}{9}\right)$
- 5) Calculate  $|5-3| - |5-8| + |2-3|$
- 6) Simplify  $5(-x+3) - 3(2x-2)$
- 7) Solve  $2(3-x) = -4(x+5)$
- 8) Solve  $(4x-3) - (2x+1) = 6$
- 9) Solve  $\frac{2}{3}x + 7 = 9$
- 10) A box of oranges weighs 40 Taiwanese kilograms. Another box of apples weighs 25 kilograms. Which box is heavier? By how much? (Note: 1 Taiwanese kilogram = 0.6 kilograms)
- 11) The lowest temperature in the world one day was  $-25^{\circ}\text{C}$ . The same day the temperature in Taipei was  $12^{\circ}\text{C}$ . How much higher was the temperature in Taipei than the lowest temperature in the world on that day?
- 12) Which integers between 1 and 50 are still integers after they are multiplied by  $\frac{1}{6}$  and  $\frac{1}{8}$ ?
- 13) If a seven-digit number like  $432\square905$  is a multiple of 3, what are the possible numbers of  $\square$ ?
- 14) Mr. Wang bought 30 kilograms of pears at the price of \$50 per kilogram. He selected 20 kilograms of good pears among the total, and sold them at the price of \$80 per kilogram. If he wants to earn 600 dollars in total after he has sold all the pears, how much per

kilogram should he label the bad pears?

- 15) The highest score in a math quiz among all the students is 100 points. What is John's actual score if one third of his score is equal to the highest score minus 20 points?
- 16) Ann's mother bought a skirt at 40% off. Ann checked the receipt and found the charged money was \$234. How much was the original price for this skirt?
- 17) A, B, C, D, E are five points on the number line below. The distances between successive points are the same. If the position of point B is  $-2$  and the position of point E is  $5$ , what is the position of point A?

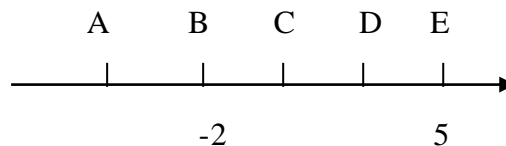

- 18) Tom has collected 90 baseball cards and David has collected 95 cards. If the number of baseball cards that Jeff has collected is more than Tom's but less than David's, what is the possible number of baseball cards that Jeff could have collected?
- 19) Peter managed a company. He lost \$7850 in the first month. He earned \$9870 in the second month, but lost \$4320 in the third month. How much did he earn or lose during these three months?
- 20) Find the possible positive integer  $a$  such that  $\frac{91}{a}$  is also a positive Integer (Multiple solutions).
- 21) If  $a = 2^2 \times 5^3 \times 11^2 \times 13^2$  and  $b = 2310$ , find the greatest common factor of both  $a$  and  $b$ . (The greatest common factor needs to be expressed in standard decomposition format, such as in  $a$ 's expression)
- 22) The sum of five successive even numbers is 70. What are these five successive even numbers?
- 23) Tommy and his family bought movie tickets on Sunday. They spent \$121 for two adult tickets and 3 child tickets. One adult ticket is \$18 more expensive than one child ticket. How much is one adult ticket? One child ticket?

24) William used one third of his money to buy two books. He then used one half of the remaining money to buy 3 pencils. Afterwards, he had \$200 left. How much money did William have originally?

25) A CD's price was 20% off on Friday. Sandra used a 20-dollar coupon to buy the CD and paid \$188 for it. What was the CD's original price?

26) What are the numbers of A, B, C, D, and E on the number line below?

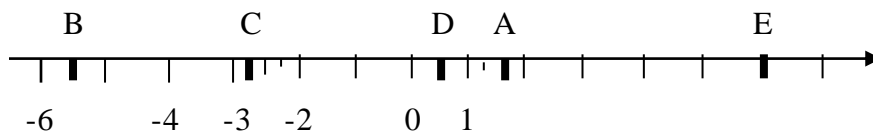

27) Calculate  $23 - 2 \times [5 + (-2^3)] + 7$

28) Calculate  $\frac{74}{123} \times \frac{4}{5} + \frac{49}{123} \times \frac{4}{5}$

29) Calculate  $4 \div \left(-\frac{1}{2}\right)^3 \times (-6) + (-3^2)$

30) Calculate  $\frac{|3 - |-5||}{2}$

31) Solve  $2(x - 4) - (3x + 4) = -20$

32) Solve  $4[x - 3(x - 2)] + 1 = 5$

33) Solve  $\frac{1}{3}(x - 3) = \frac{1}{4}(x + 6) + 1$

34) Solve  $2x - \frac{x - 5}{4} = 17$

## Appendix C. Item correlation by male and female groups

| ITEM | v1  | v2  | v3  | v4  | v5  | v6  | v7  | v8  | v9  | v10 | v11 | v12 | v13 | v14 | v15 | v16 | v17 | v18 | v19 | v20 | v21 | v22 | v23 | v24 | v25 | v26 | v27 | v28 | v29 | v30 | v31 | v32 | v33 | v34 |
|------|-----|-----|-----|-----|-----|-----|-----|-----|-----|-----|-----|-----|-----|-----|-----|-----|-----|-----|-----|-----|-----|-----|-----|-----|-----|-----|-----|-----|-----|-----|-----|-----|-----|-----|
| v1   | 1   | .39 | .42 | .42 | .44 | .40 | .42 | .48 | .44 | .38 | .38 | .40 | .38 | .35 | .40 | .35 | .34 | .38 | .37 | .36 | .34 | .32 | .35 | .29 | .28 | .40 | .38 | .38 | .23 | .32 | .43 | .41 | .45 | .32 |
| v2   | .42 | 1   | .36 | .40 | .38 | .37 | .40 | .42 | .39 | .34 | .36 | .43 | .36 | .38 | .37 | .40 | .33 | .38 | .38 | .39 | .35 | .30 | .34 | .28 | .32 | .37 | .35 | .38 | .26 | .34 | .36 | .37 | .40 | .31 |
| v3   | .38 | .44 | 1   | .49 | .40 | .39 | .41 | .44 | .49 | .40 | .41 | .40 | .36 | .41 | .47 | .39 | .36 | .42 | .42 | .44 | .36 | .35 | .40 | .32 | .32 | .39 | .41 | .41 | .26 | .34 | .43 | .34 | .44 | .30 |
| v4   | .35 | .35 | .42 | 1   | .45 | .47 | .49 | .49 | .51 | .41 | .46 | .48 | .41 | .45 | .45 | .42 | .39 | .42 | .38 | .46 | .43 | .37 | .47 | .33 | .38 | .35 | .46 | .45 | .31 | .39 | .46 | .43 | .49 | .37 |
| v5   | .42 | .45 | .42 | .36 | 1   | .49 | .50 | .54 | .49 | .45 | .42 | .48 | .42 | .44 | .48 | .44 | .38 | .44 | .44 | .45 | .45 | .43 | .46 | .33 | .37 | .42 | .46 | .46 | .30 | .42 | .50 | .48 | .46 | .36 |
| v6   | .43 | .44 | .44 | .38 | .50 | 1   | .64 | .66 | .58 | .38 | .44 | .48 | .45 | .40 | .51 | .44 | .45 | .41 | .40 | .43 | .47 | .42 | .47 | .32 | .42 | .38 | .51 | .45 | .28 | .40 | .59 | .60 | .54 | .43 |
| v7   | .44 | .51 | .41 | .37 | .49 | .61 | 1   | .68 | .64 | .42 | .49 | .53 | .42 | .43 | .54 | .44 | .45 | .40 | .42 | .48 | .49 | .45 | .50 | .40 | .45 | .43 | .56 | .47 | .34 | .44 | .61 | .62 | .61 | .45 |
| v8   | .49 | .46 | .43 | .40 | .51 | .60 | .69 | 1   | .68 | .43 | .48 | .50 | .46 | .43 | .57 | .42 | .45 | .38 | .37 | .49 | .47 | .44 | .48 | .39 | .41 | .40 | .56 | .47 | .32 | .46 | .68 | .63 | .59 | .43 |
| v9   | .51 | .49 | .50 | .41 | .52 | .55 | .58 | .60 | 1   | .45 | .53 | .56 | .47 | .47 | .58 | .51 | .45 | .47 | .47 | .51 | .50 | .42 | .49 | .37 | .43 | .47 | .53 | .54 | .33 | .41 | .58 | .57 | .59 | .42 |
| v10  | .33 | .33 | .38 | .29 | .35 | .31 | .35 | .37 | .43 | 1   | .37 | .43 | .37 | .44 | .42 | .46 | .29 | .48 | .47 | .41 | .34 | .34 | .39 | .26 | .31 | .39 | .36 | .39 | .24 | .34 | .36 | .33 | .35 | .27 |
| v11  | .39 | .40 | .37 | .33 | .49 | .43 | .52 | .49 | .45 | .35 | 1   | .54 | .51 | .50 | .58 | .51 | .47 | .49 | .45 | .50 | .45 | .46 | .48 | .36 | .40 | .40 | .45 | .45 | .30 | .41 | .46 | .47 | .44 | .39 |
| v12  | .35 | .39 | .38 | .38 | .47 | .48 | .51 | .48 | .47 | .29 | .50 | 1   | .60 | .56 | .59 | .55 | .53 | .50 | .49 | .62 | .56 | .54 | .59 | .44 | .50 | .45 | .50 | .56 | .35 | .49 | .50 | .52 | .52 | .47 |
| v13  | .36 | .33 | .34 | .30 | .43 | .42 | .47 | .42 | .44 | .34 | .49 | .52 | 1   | .53 | .57 | .51 | .51 | .46 | .43 | .58 | .55 | .46 | .51 | .46 | .51 | .41 | .45 | .44 | .30 | .44 | .42 | .46 | .46 | .43 |
| v14  | .37 | .41 | .36 | .37 | .42 | .40 | .51 | .46 | .44 | .31 | .53 | .52 | .53 | 1   | .62 | .56 | .52 | .51 | .46 | .57 | .53 | .48 | .53 | .44 | .56 | .40 | .42 | .48 | .38 | .40 | .44 | .45 | .50 | .48 |
| v15  | .39 | .42 | .41 | .32 | .50 | .47 | .53 | .50 | .50 | .34 | .60 | .53 | .53 | .60 | 1   | .58 | .59 | .49 | .49 | .61 | .57 | .53 | .61 | .48 | .56 | .45 | .54 | .52 | .36 | .47 | .53 | .50 | .56 | .48 |
| v16  | .34 | .37 | .43 | .34 | .45 | .40 | .44 | .43 | .42 | .33 | .49 | .46 | .44 | .51 | .52 | 1   | .47 | .50 | .49 | .55 | .45 | .48 | .51 | .40 | .51 | .46 | .43 | .42 | .30 | .45 | .41 | .43 | .44 | .41 |
| v17  | .29 | .36 | .33 | .29 | .42 | .38 | .47 | .40 | .37 | .22 | .46 | .49 | .51 | .49 | .53 | .41 | 1   | .36 | .34 | .58 | .60 | .57 | .59 | .62 | .58 | .37 | .50 | .48 | .38 | .51 | .42 | .48 | .52 | .54 |
| v18  | .37 | .36 | .38 | .30 | .42 | .40 | .47 | .40 | .45 | .41 | .45 | .42 | .42 | .43 | .48 | .45 | .32 | 1   | .61 | .51 | .43 | .42 | .46 | .35 | .38 | .45 | .39 | .42 | .24 | .36 | .42 | .42 | .41 | .33 |
| v19  | .38 | .35 | .40 | .35 | .42 | .41 | .44 | .45 | .47 | .42 | .39 | .40 | .39 | .39 | .42 | .44 | .31 | .45 | 1   | .45 | .41 | .43 | .45 | .30 | .39 | .51 | .42 | .45 | .29 | .39 | .42 | .42 | .42 | .33 |
| v20  | .35 | .37 | .37 | .37 | .42 | .41 | .48 | .45 | .46 | .28 | .45 | .56 | .50 | .51 | .54 | .50 | .55 | .42 | .40 | 1   | .60 | .59 | .60 | .50 | .51 | .45 | .51 | .56 | .39 | .50 | .51 | .51 | .51 | .50 |
| v21  | .37 | .42 | .34 | .39 | .47 | .48 | .54 | .48 | .47 | .30 | .47 | .55 | .54 | .55 | .52 | .44 | .51 | .40 | .39 | .57 | 1   | .59 | .55 | .55 | .49 | .40 | .53 | .50 | .43 | .51 | .49 | .56 | .56 | .56 |
| v22  | .29 | .33 | .30 | .26 | .41 | .42 | .45 | .41 | .41 | .26 | .46 | .46 | .51 | .49 | .53 | .41 | .48 | .37 | .35 | .49 | .53 | 1   | .56 | .48 | .50 | .40 | .49 | .44 | .40 | .47 | .46 | .49 | .48 | .46 |
| v23  | .32 | .40 | .38 | .32 | .47 | .44 | .51 | .48 | .44 | .29 | .56 | .52 | .52 | .59 | .61 | .51 | .53 | .43 | .43 | .56 | .57 | .54 | 1   | .48 | .57 | .45 | .49 | .50 | .36 | .53 | .51 | .53 | .50 | .49 |
| v24  | .21 | .30 | .24 | .21 | .27 | .30 | .39 | .31 | .32 | .18 | .37 | .42 | .44 | .44 | .46 | .36 | .56 | .28 | .28 | .47 | .45 | .45 | .48 | 1   | .53 | .33 | .41 | .41 | .41 | .45 | .38 | .44 | .42 | .50 |
| v25  | .27 | .31 | .29 | .22 | .39 | .35 | .43 | .40 | .35 | .24 | .44 | .44 | .43 | .46 | .52 | .50 | .52 | .35 | .35 | .46 | .48 | .50 | .51 | .49 | 1   | .40 | .42 | .46 | .43 | .48 | .42 | .42 | .48 | .48 |
| v26  | .36 | .33 | .38 | .35 | .41 | .41 | .41 | .40 | .46 | .38 | .37 | .44 | .34 | .36 | .44 | .42 | .32 | .45 | .43 | .38 | .40 | .36 | .44 | .28 | .31 | 1   | .48 | .52 | .29 | .42 | .45 | .47 | .50 | .35 |
| v27  | .41 | .45 | .41 | .41 | .48 | .47 | .57 | .53 | .50 | .30 | .40 | .44 | .44 | .50 | .53 | .40 | .50 | .37 | .42 | .52 | .54 | .42 | .52 | .42 | .41 | .45 | 1   | .55 | .39 | .47 | .59 | .61 | .60 | .53 |
| v28  | .35 | .37 | .38 | .36 | .40 | .39 | .44 | .43 | .44 | .30 | .39 | .43 | .44 | .43 | .47 | .40 | .43 | .37 | .40 | .45 | .48 | .42 | .46 | .36 | .39 | .46 | .50 | 1   | .35 | .48 | .52 | .52 | .58 | .45 |
| v29  | .24 | .31 | .27 | .29 | .29 | .35 | .37 | .33 | .33 | .19 | .34 | .33 | .30 | .36 | .34 | .30 | .36 | .25 | .29 | .34 | .40 | .29 | .38 | .26 | .28 | .29 | .41 | .34 | 1   | .33 | .37 | .40 | .41 | .46 |
| v30  | .33 | .34 | .29 | .29 | .44 | .40 | .44 | .42 | .38 | .22 | .40 | .39 | .39 | .39 | .44 | .36 | .44 | .33 | .33 | .39 | .47 | .37 | .41 | .36 | .39 | .37 | .46 | .39 | .35 | 1   | .45 | .47 | .48 | .46 |
| v31  | .47 | .47 | .40 | .38 | .51 | .57 | .62 | .69 | .57 | .35 | .45 | .42 | .41 | .46 | .50 | .40 | .42 | .41 | .44 | .45 | .47 | .43 | .47 | .32 | .40 | .45 | .56 | .48 | .39 | .43 | 1   | .69 | .63 | .47 |
| v32  | .40 | .44 | .40 | .35 | .51 | .59 | .64 | .62 | .52 | .30 | .44 | .50 | .42 | .45 | .52 | .39 | .47 | .38 | .44 | .52 | .52 | .46 | .52 | .43 | .44 | .43 | .58 | .45 | .39 | .46 | .69 | 1   | .67 | .53 |
| v33  | .40 | .43 | .41 | .39 | .51 | .51 | .62 | .57 | .56 | .32 | .46 | .48 | .46 | .50 | .52 | .42 | .45 | .39 | .43 | .49 | .51 | .48 | .49 | .42 | .44 | .45 | .60 | .47 | .40 | .45 | .64 | .66 | 1   | .57 |
| v34  | .28 | .32 | .22 | .25 | .36 | .37 | .46 | .42 | .35 | .20 | .39 | .44 | .45 | .47 | .49 | .36 | .52 | .30 | .29 | .41 | .50 | .52 | .48 | .49 | .48 | .32 | .48 | .39 | .35 | .41 | .43 | .52 | .50 | 1   |

Note. All intracorrelations between items were significant at .01 alpha level. Correlations in upper and lower triangular matrixs were of male group ( $N=734$ ) and female group ( $N=705$ ), respectively.

Appendix D. Descriptive statistics of items by raw scores and indices scores for males  
(*N*=734) and females (*N*=705)

| item | <i>Max</i><br>score | <i>Raw Mean</i> |        | <i>Raw SD</i> |        | <i>cp</i> |        | <i>mp</i> |        | <i>bp</i> |        | <i>wp</i> |        |
|------|---------------------|-----------------|--------|---------------|--------|-----------|--------|-----------|--------|-----------|--------|-----------|--------|
|      |                     | male            | female | male          | female | male      | female | male      | female | male      | female | male      | female |
| v1   | 2                   | 1.30            | 1.39   | 0.93          | 0.90   | .085      | .074   | .420      | .445   | .052      | .052   | .025      | .020   |
| v2   | 2                   | 1.30            | 1.26   | 0.94          | 0.95   | .084      | .117   | .416      | .352   | .056      | .047   | .026      | .026   |
| v3   | 3                   | 1.85            | 2.05   | 1.40          | 1.33   | .107      | .085   | .381      | .420   | .057      | .052   | .023      | .020   |
| v4   | 3                   | 1.68            | 1.99   | 1.24          | 1.16   | .141      | .080   | .308      | .375   | .065      | .072   | .035      | .037   |
| v5   | 2                   | 1.27            | 1.29   | 0.95          | 0.94   | .099      | .113   | .420      | .385   | .032      | .029   | .022      | .021   |
| v6   | 2                   | 1.06            | 1.15   | 0.95          | 0.95   | .188      | .162   | .282      | .297   | .040      | .038   | .029      | .024   |
| v7   | 3                   | 1.65            | 1.76   | 1.38          | 1.34   | .164      | .150   | .321      | .326   | .036      | .027   | .025      | .022   |
| v8   | 3                   | 1.71            | 1.88   | 1.44          | 1.40   | .148      | .127   | .357      | .374   | .031      | .025   | .016      | .016   |
| v9   | 3                   | 1.93            | 2.11   | 1.34          | 1.26   | .103      | .080   | .436      | .469   | .025      | .028   | .014      | .013   |
| v10  | 3                   | 2.36            | 2.55   | 1.16          | 0.98   | .028      | .015   | .632      | .709   | .027      | .032   | .009      | .007   |
| v11  | 2                   | 1.23            | 1.23   | 0.97          | 0.96   | .114      | .130   | .398      | .351   | .028      | .025   | .024      | .028   |
| v12  | 3                   | 1.39            | 1.50   | 1.33          | 1.29   | .265      | .220   | .214      | .212   | .034      | .041   | .028      | .037   |
| v13  | 4                   | 1.74            | 1.90   | 1.71          | 1.68   | .290      | .231   | .174      | .195   | .040      | .040   | .044      | .045   |
| v14  | 4                   | 1.84            | 1.86   | 1.87          | 1.85   | .263      | .256   | .215      | .197   | .034      | .029   | .029      | .030   |
| v15  | 3                   | 1.47            | 1.57   | 1.49          | 1.48   | .254      | .212   | .254      | .266   | .012      | .016   | .019      | .018   |
| v16  | 3                   | 1.60            | 1.81   | 1.47          | 1.42   | .185      | .139   | .296      | .329   | .035      | .035   | .024      | .026   |
| v17  | 4                   | 1.03            | 1.04   | 1.64          | 1.61   | .583      | .559   | .062      | .048   | .012      | .009   | .017      | .022   |
| v18  | 2                   | 1.34            | 1.52   | 0.92          | 0.82   | .080      | .041   | .463      | .576   | .034      | .030   | .017      | .013   |
| v19  | 2                   | 1.32            | 1.50   | 0.81          | 0.74   | .081      | .048   | .429      | .520   | .056      | .045   | .022      | .020   |
| v20  | 5                   | 1.70            | 1.83   | 1.90          | 1.91   | .426      | .374   | .103      | .099   | .032      | .034   | .033      | .041   |
| v21  | 3                   | 0.95            | 1.18   | 1.33          | 1.39   | .478      | .359   | .099      | .133   | .017      | .020   | .018      | .024   |
| v22  | 5                   | 1.62            | 1.90   | 2.20          | 2.26   | .465      | .368   | .098      | .117   | .019      | .023   | .029      | .036   |
| v23  | 5                   | 1.94            | 2.28   | 2.34          | 2.42   | .375      | .276   | .151      | .199   | .017      | .018   | .023      | .020   |
| v24  | 4                   | 0.84            | 0.83   | 1.60          | 1.59   | .681      | .634   | .037      | .030   | .006      | .006   | .018      | .018   |
| v25  | 3                   | 0.93            | 0.94   | 1.38          | 1.36   | .484      | .462   | .094      | .076   | .016      | .016   | .025      | .032   |
| v26  | 5                   | 3.48            | 3.85   | 2.04          | 1.78   | .060      | .034   | .497      | .582   | .039      | .038   | .019      | .015   |
| v27  | 3                   | 1.22            | 1.45   | 1.40          | 1.43   | .356      | .242   | .151      | .217   | .026      | .027   | .029      | .025   |
| v28  | 3                   | 1.46            | 1.68   | 1.44          | 1.42   | .244      | .162   | .234      | .286   | .032      | .037   | .029      | .033   |
| v29  | 3                   | 0.54            | 0.80   | 1.10          | 1.26   | .710      | .521   | .023      | .040   | .009      | .022   | .034      | .046   |
| v30  | 2                   | 0.70            | 0.78   | 0.95          | 0.97   | .402      | .350   | .122      | .119   | .026      | .028   | .032      | .043   |
| v31  | 3                   | 1.40            | 1.68   | 1.43          | 1.39   | .267      | .174   | .217      | .291   | .032      | .036   | .024      | .018   |
| v32  | 4                   | 1.64            | 1.89   | 1.83          | 1.84   | .349      | .262   | .158      | .198   | .026      | .029   | .027      | .024   |
| v33  | 3                   | 1.24            | 1.40   | 1.36          | 1.32   | .338      | .259   | .166      | .191   | .026      | .035   | .027      | .027   |
| v34  | 4                   | 0.95            | 0.99   | 1.68          | 1.70   | .630      | .579   | .051      | .044   | .008      | .009   | .017      | .016   |
